# Supplementary material
Source: PubMed Central journal article supplement (PMC8195536)
Supplement: kiab106_supplementary_data.pdf [file kiab106_supplementary_data.pdf]

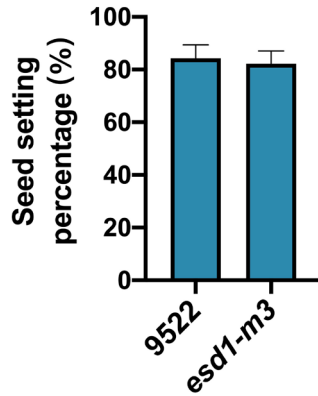

1

2 **Supplementary Figure S1.** The seed setting rate of *esd1-m3*. Error bars indicate SD (n=15).

3

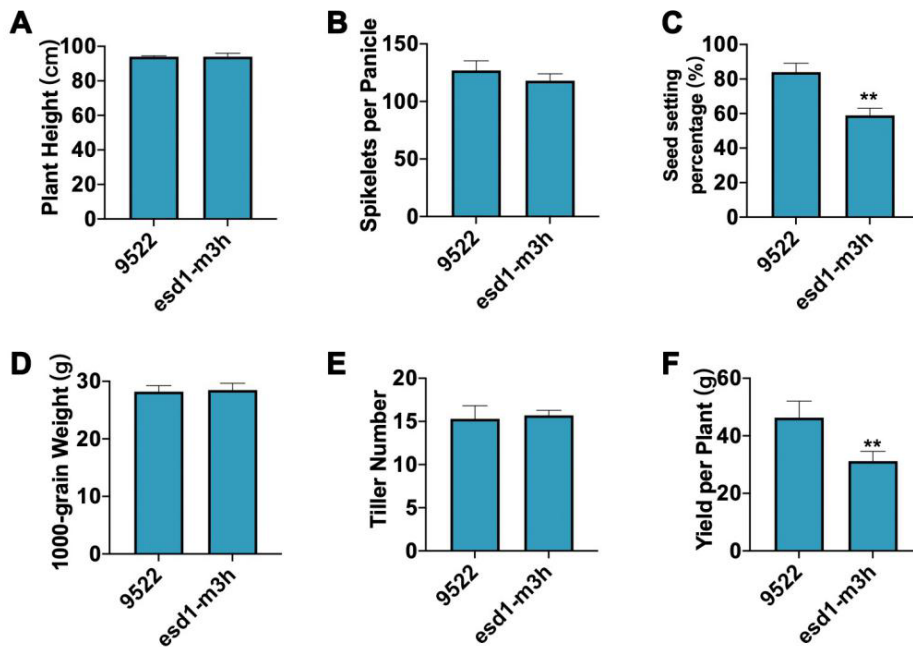

4

5 **Supplementary Figure S2.** Phenotypic data of *esd1-m3h*. A, Plant height of *esd1-m3h*. B,  
 6 Spikelets per panicle of *esd1-m3h*. C, Seed setting rate of *esd1-m3h*. D, 1000-grain weight of  
 7 *esd1-m3h*. E, Tiller number of *esd1-m3h*. F, Yield per plant of *esd1-m3h*. Error bars indicate  
 8 SD (n=15).

9

10

11

12

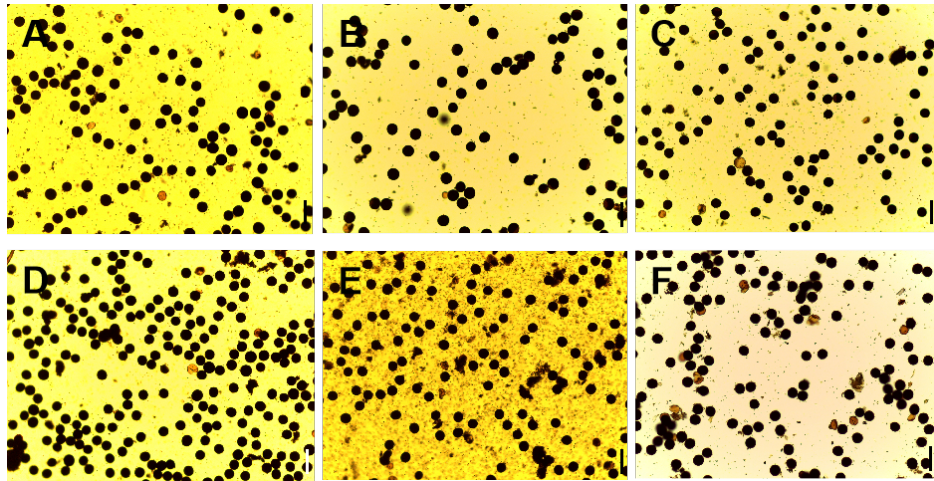

13

14 **Supplementary Figure S3.** Effects of photoperiods on the fertility of *esdl* mutants. A, 9522  
 15 for long-day treatment. B, *esdl-m1* for long-day treatment. C, *esdl-m2* for long-day treatment.  
 16 D, 9522 for short-day treatment. E, *esdl-m1* for short-day treatment. F, *esdl-m2* for short day  
 17 treatment. bars=50  $\mu$ m.

18

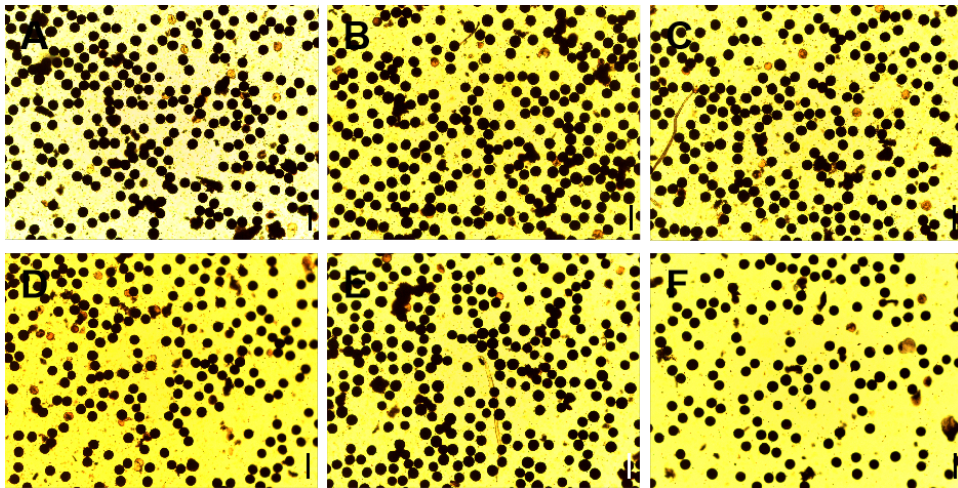

19

20 **Supplementary Figure S4.** Effects of temperature treatments on the fertility of *esdl* mutants.  
 21 A, 9522 for high-temperature treatment. B, *esdl-m1* for high-temperature treatment. C,  
 22 *esdl-m2* for high-temperature treatment. D, 9522 for low-temperature treatment. E, *esdl-m1*  
 23 for low-temperature treatment. F, *esdl-m2* for low-temperature treatment. bars=50  $\mu$ m.

24

25

26

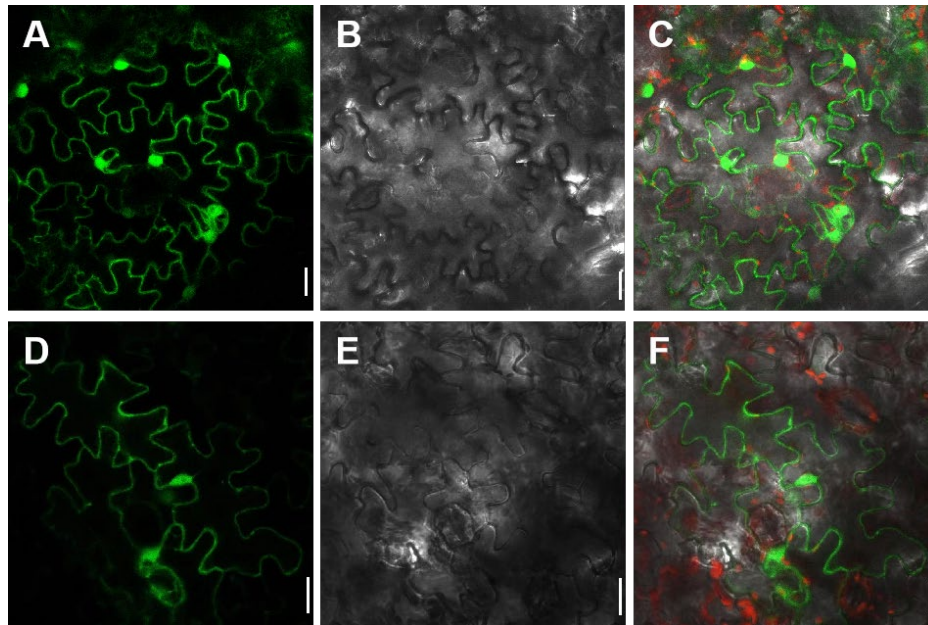

27

28 **Supplementary Figure S5.** The subcellular localization of ESD1 in tobacco. A-C, *p1305-GFP*.  
 29 D-F, *p1305-ESD1-GFP*. A, D were the green fluorescent channel. B, E were the bright field  
 30 channel. C, F were the green fluorescence + bright field channel. bars=20  $\mu\text{m}$ .

31

32

33

34 **Supplemental Table S1.** Subcellular localization prediction for ESD1 protein with TargetP

| Protein type | Other  | Signal peptide | Mitochondrial transfer peptide | Chloroplast transfer peptide | Thylakoid luminal transfer peptide |
|--------------|--------|----------------|--------------------------------|------------------------------|------------------------------------|
| Likelihood   | 0.9431 | 0.002          | 0.0019                         | 0.0528                       | 0.0001                             |

35

36

37

38

39

40

**Supplemental Table S2.** Amplification primers for target sites TS1 and TS2

| Primer Names      | Sequences (5'-3')        |
|-------------------|--------------------------|
| <i>ESD1-U3-F</i>  | ggcaGTACCTTGATGATGTCGAGG |
| <i>ESD1-U3-R</i>  | aaacCCTCGACATCATCAAGGTAC |
| <i>ESD1-U6a-F</i> | gccgGAGTTCCTCAAGTCGATGA  |
| <i>ESD1-U6a-R</i> | aaacTCATCGACTTGAGGAACTC  |

41

42

43

44

**Supplemental Table S3.** Amplification primers for expression cassettes

| Primer Names | Sequences (5'-3')                      |
|--------------|----------------------------------------|
| Uctcg-B1'    | TTCAGAggtctcTctcgCACTGGAATCGGCAGCAAAGG |
| gRctga-B2    | AGCGTGggtctcGtcagGGTCCATCCACTCCAAGCTC  |

|           |                                        |
|-----------|----------------------------------------|
| Uctga-B2' | TTCAGAggtctcTctgaCACTGGAATCGGCAGCAAAGG |
| gRcggg-BL | AGCGTGgggtctcGaccgGGTCCATCCACTCCAAGCTC |

45  
46  
47  
48

**Supplemental Table S4. Detection primers for target sites mutation**

| Primer Names     | Sequences (5'-3')       |
|------------------|-------------------------|
| <i>SP1</i>       | CCCGACATAGATGCAATAACTTC |
| <i>SP2</i>       | GCGCGGTGTCATCTATGTTACT  |
| <i>ESD1-JC-F</i> | GGGATGATGCCAAGGAAC      |
| <i>ESD1-JC-R</i> | GAGGAGGAGGTCGGTGAA      |

49  
50  
51  
52

**Supplemental Table S5. Primers for qRT-PCR reaction**

| Primer Names     | Sequences (5'-3')    |
|------------------|----------------------|
| <i>ESD1-qP-F</i> | CCTTGATCCGCCGCTGTA   |
| <i>ESD1-qP-R</i> | GGAATCCACGATGGAGTTCG |
| Action-F         | CCTTCAACACCCCTGCTATG |
| Action-R         | CAATGCCAGGGAACATAGTG |

53  
54  
55

**Supplemental Table S6. Primers for *in situ* hybridization**

| Primer Names      | Sequences (5'-3')    |
|-------------------|----------------------|
| <i>ESD1-ish-F</i> | CGGCCTTTCTTGACGACCTT |
| <i>ESD1-ish-R</i> | GTCCGGGCGACTCAAAGAA  |

56  
57  
58
